# Supplementary material
Source: publisher figshare collection journal article supplement (https://karger.figshare.com/ndownloader/files/26148971)
Supplement: Supplementary file 1 [file 26148971]

**Supplementary Table 2.** Quality of life evaluation after PRRT administration based on G.I.NET-21 questionnaires‎

| **G.I.NET-21 domains** | **Baseline** | **1st cycle** | **2nd cycle** | **3rd cycle** | **4th cycle** |
| --- | --- | --- | --- | --- | --- |
| Endocrine score | 43.2 ± 7.7 | 20.8 ± 5.7 | 26.6 ± 7.5 | 30.5 ± 5.3 | 27.8 ± 5.6 |
| GI score | 28.1 ± 8.1 | 23.3 ± 8.4 | 17.3 ± 10.2 | 35.0 ± 12.3 | 46.7 ± 6.7 |
| Treatment score | 25.0 ± 7.7 | 13.9 ± 6.7 | 13.3 ± 6.2 | 16.7 ± 9.6 | 50.0 ±16.7 |
| Disease-related worries score | 58.0 ± 11.2 | 41.7 ± 9.2 | 33.3 ± 10.6 | 44.4 ± 19.3 | 72.2 ± 27.8 |
| Social Functioning score | 48.1 ± 9.4 | 37.5 ± 7.3 | 37.7 ± 2.7 | 47.2 ± 5.3 | 61.2 ± 5.6 |
| Total score | 35.9 ± 5.5 | 24.8 ± 5.0 | 22.7 ± 4.3 | 31.2 ± 5.5 | 45.8 ± 9.2 |
| **Note:** The G.I.NET-21 results were converted to a 100-point scale per the European Organisation for Research and Treatment of Cancer (EORTC) manual. All are negative scales in which higher scores correspond to increased symptoms/problems. | | | | | |
